# Supplementary material
Source: publisher site journal article supplement (https://www.dovepress.com/article/448999)
Supplement: Supplementary file 1 [file get_supplementary_file.php]

**Supplementary material**

**Table S1.** Descriptive Statistics for Statements of Physician’s Choice based on Symptoms (N=808)

| **Specialty** | **Who would you see if you develop joints pain/swelling** | **Who would you see if you develop photosensitive rash** | **Who would you see if you develop painful discoloration of finger after cold** | **Who would you see if you develop oral and genital ulcers** | **Who would you see if you develop back pain** |
| --- | --- | --- | --- | --- | --- |
| **Rheumatologist** | 358 (44.3) | 77 (9.5) | 240 (29.7) | 80 (9.9) | 83 (10.3) |
| **Orthopedic** | 297 (36.8) | 27 (3.3) | 117 (14.5) | 25 (3.1) | 511 (63.2) |
| **General Physician** | 39 (4.8) | 49 (6.1) | 131 (16.2) | 102 (12.6) | 63 (7.8) |
| **Family Physician** | 55 (6.8) | 58 (7.2) | 80 (9.9) | 108 (13.4) | 71 (8.8) |
| **Internist** | 32 (4.0) | 28 (3.5) | 83 (10.3) | 186 (23.0) | 52 (6.4) |
| **Emergency Physician** | 13 (1.6) | 12 (1.5) | 87 (10.8) | 38 (4.7) | 17 (2.1) |
| **Dermatologist** | 7 (0.9) | 557 (68.9) | 62 (7.7) | 228 (28.2) | 3 (0.4) |
| **Urologist** | 1 (0.1) | 0 (0.0) | 0 (0.0) | 17 (2.1) | 0 (0.0) |
| **Hematologist** | 0 (0.0) | 0 (0.0) | 1 (0.1) | 0 (0.0) | 0 (0.0) |
| **Gynecologist** | 0 (0.0) | 0 (0.0) | 0 (0.0) | 15 (1.9) | 1 (0.1) |
| **General Surgeon** | 0 (0.0) | 0 (0.0) | 0 (0.0) | 1 (0.1) | 0 (0.0) |
| **Ear, Nose, Throat** | 0 (0.0) | 0 (0.0) | 0 (0.0) | 4 (0.5) | 0 (0.0) |
| **Physiotherapist** | 1 (0.1) | 0 (0.0) | 0 (0.0) | 0 (0.0) | 3 (0.4) |
| **Neurologist** | 1 (0.1) | 0 (0.0) | 2 (0.2) | 0 (0.0) | 4 (0.5) |
| **General practitioner** | 0 (0.0) | 0 (0.0) | 0 (0.0) | 1 (0.1) | 0 (0.0) |
| **Infectious Disease** | 0 (0.0) | 0 (0.0) | 0 (0.0) | 3 (0.4) | 0 (0.0) |
| **Immunologist** | 1 (0.1) | 0 (0.0) | 0 (0.0) | 0 (0.0) | 0 (0.0) |
| **Dentist** | 0 (0.0) | 0 (0.0) | 0 (0.0) | 1 (0.1) | 0 (0.0) |
| **Vascular Surgeon** | 0 (0.0) | 0 (0.0) | 1 (0.1) | 0 (0.0) | 0 (0.0) |
| **Neurosurgeon** | 0 (0.0) | 0 (0.0) | 0 (0.0) | 0 (0.0) | 1 (0.1) |
| **Cardiologist/Pulmonologist** | 0 (0.0) | 0 (0.0) | 1 (0.1) | 0 (0.0) | 0 (0.0) |
| **I don’t know** | 3 (0.4) | 1 (0.1) | 3 (0.4) | 7 (0.9) | 1 (0.1) |
|  |  |  |  |  |  |


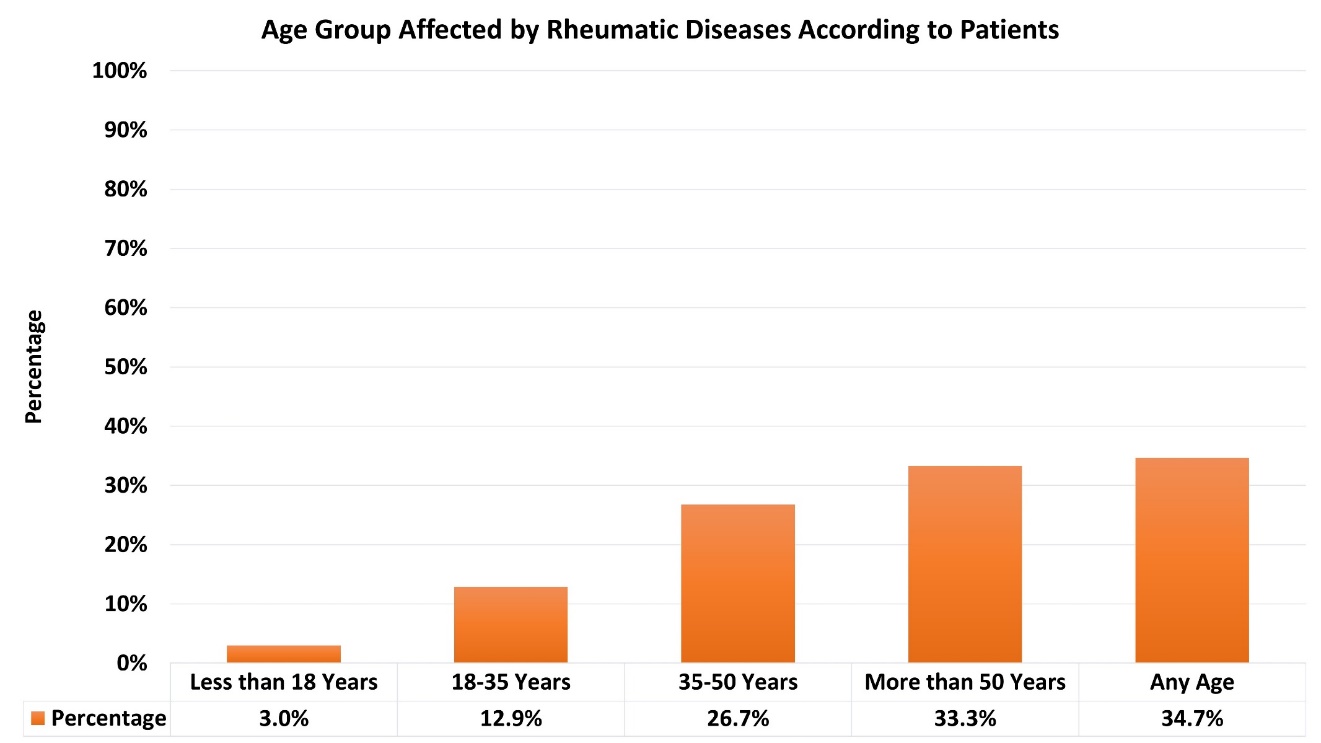


Figure S1: Age Group Affected by Rheumatic Diseases According to Patients (N=808)
